# Supplementary material for: Environmental and Economic Assessment of Portable Systems: Production of Wood-Briquettes and Torrefied-Briquettes to Generate Heat and Electricity
Source: MDPI journal article supplement (doi:10.3390/fuels2030020), 2021-09-09
Supplement: s1 [file s1]

Supporting Information

# **Environmental and economic assessment of portable systems: Production of wood-briquettes and torrefied-briquettes to generate heat and electricity**

**Sevda Alanya-Rosenbaum<sup>1,2</sup>, Kamalakanta Sahoo<sup>2,3,\*</sup>, Dalia Abbas<sup>4</sup>, E.M. (Ted) Bilek<sup>2</sup> and Richard Bergman<sup>2</sup>**

<sup>1</sup> USDA Forest Service Forest Products Laboratory, Madison, WI; sevda.alanya-rosenbaum@usda.gov

<sup>2</sup> Department of Forest Biomaterials, North Carolina State University, Raleigh, NC

<sup>3</sup> Department of Biological Systems Engineering, University of Wisconsin-Madison, Madison, WI

<sup>4</sup> American University, Washington, DC; saleh@american.edu

\* Correspondence: Kamalakanta.sahoo@usda.gov; Tel.: 01-608-231-9272

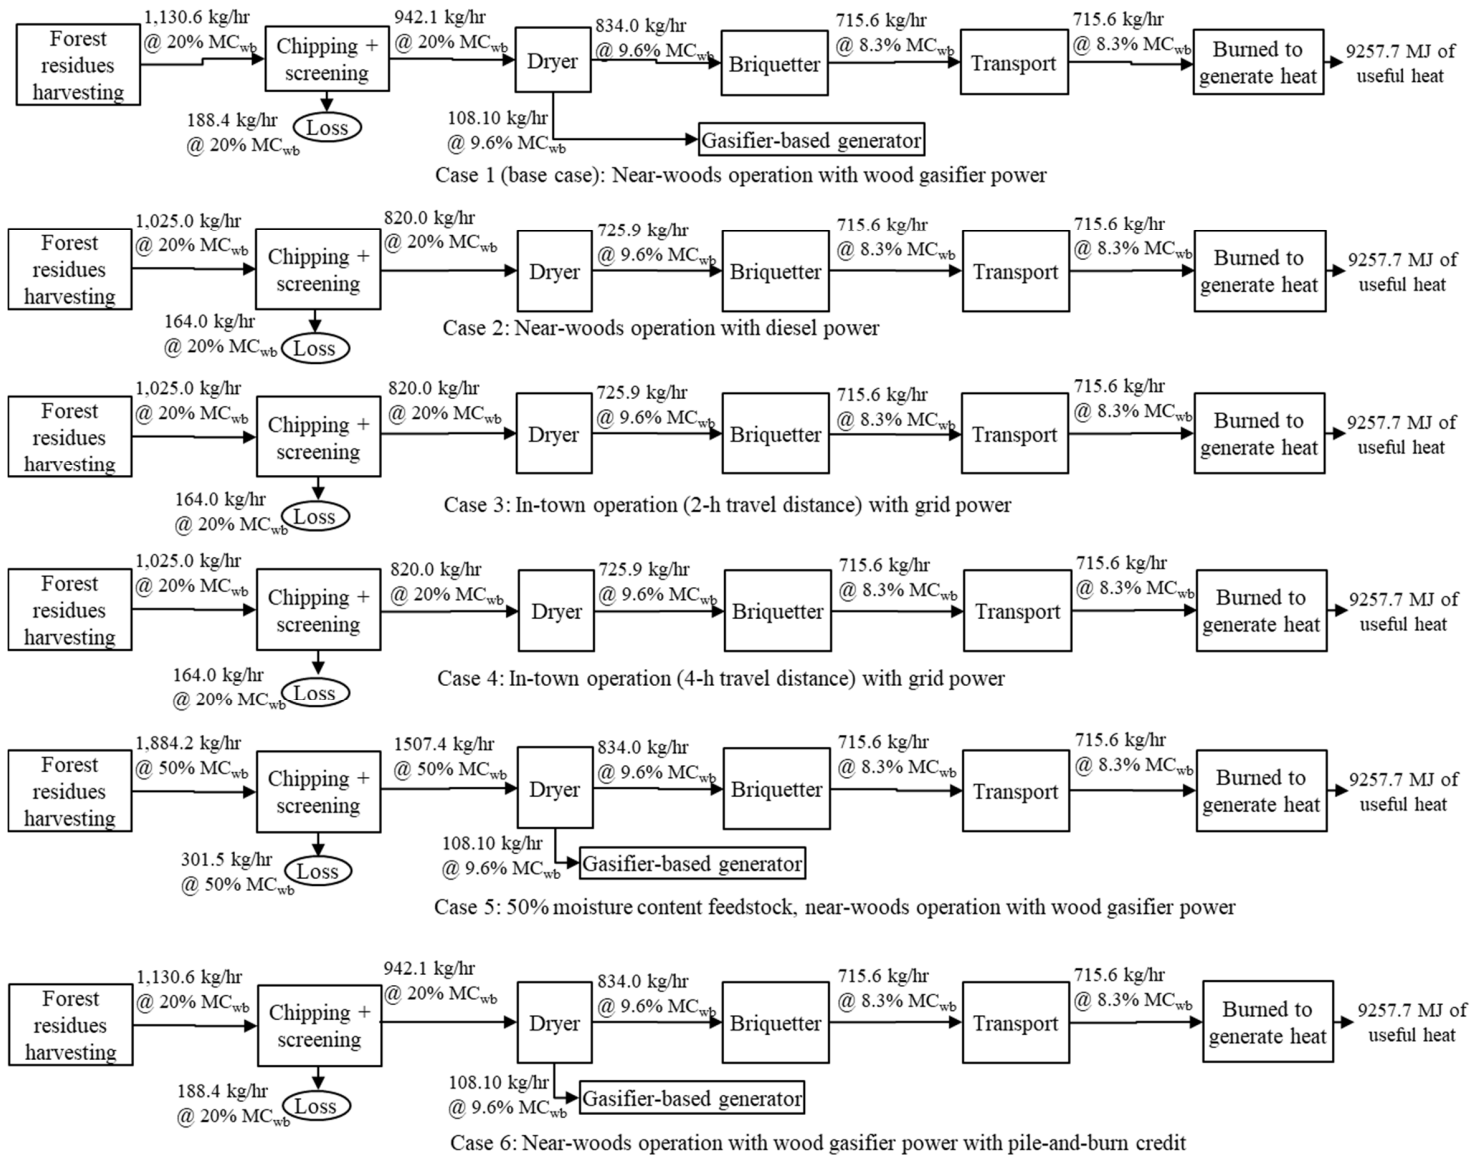

Figure S1: Mass balances of case studies for heat generation from wood briquettes (WB)

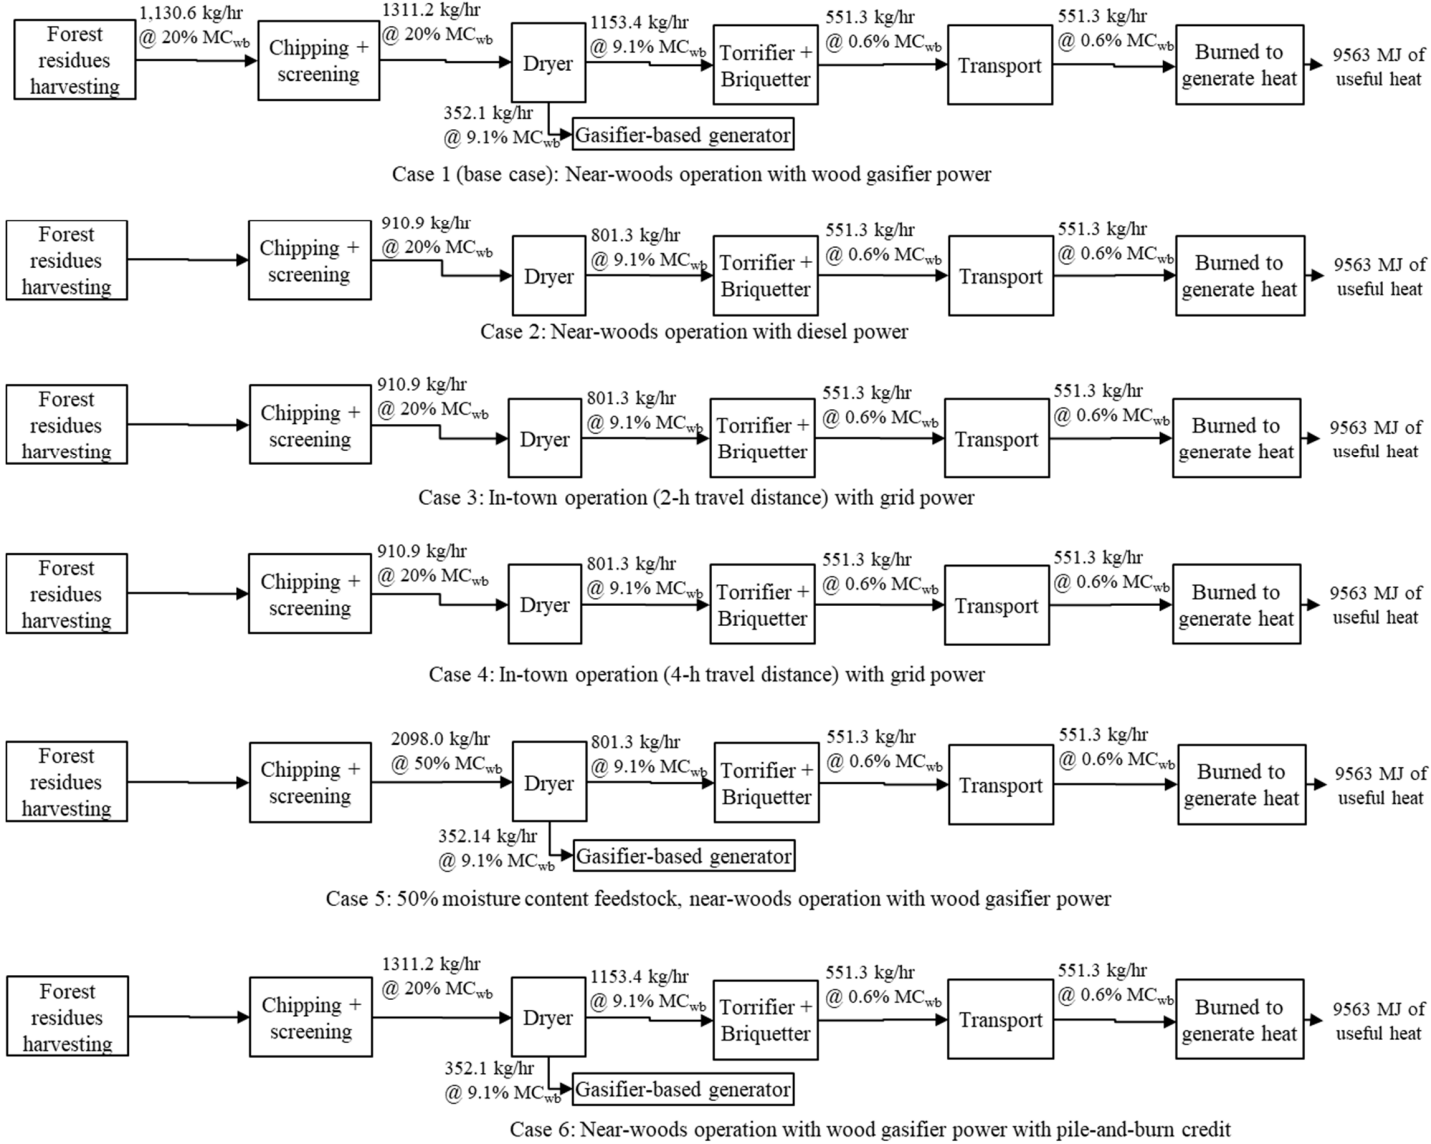

Figure S2: Mass balances of cases studies for heat generation from torrefied wood briquettes (TWB)

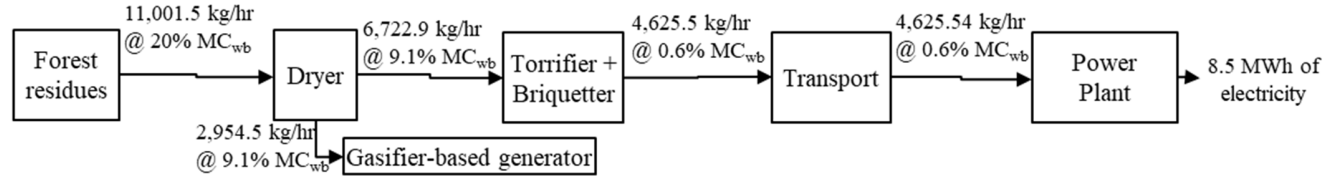

Case 1 (base case): Near-woods operation with wood gasifier power

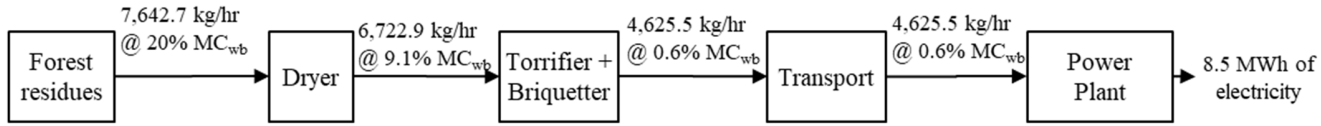

Case 4: in-town operation (4-h travel distance) with grid power

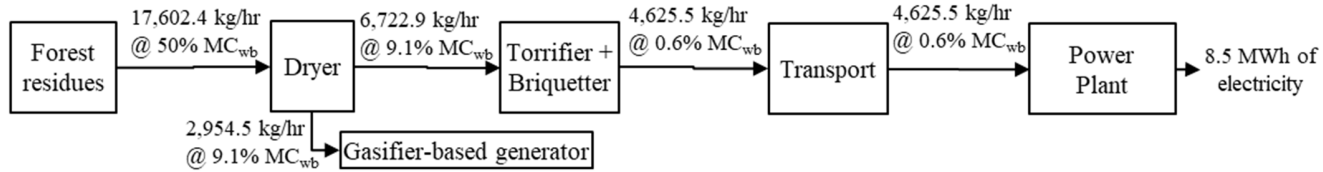

Case 5: 50% moisture content feedstock, near-woods operation with wood gasifier power

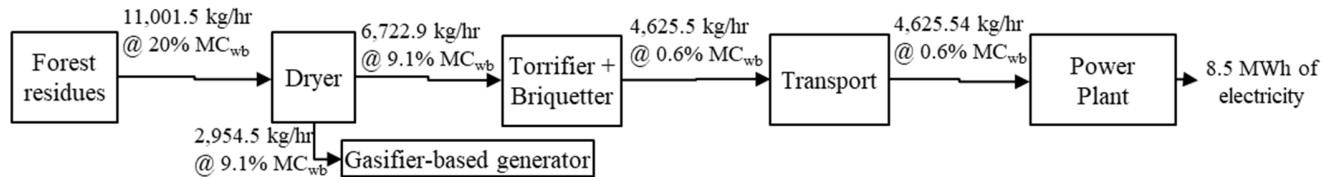

Case 6: Near-woods operation with wood gasifier power with pile-and-burn credit

Figure S3: Mass balances of case studies for electricity from torrefied wood briquettes (TWB)

Table S1: Cradle-to-gate input-output flow analysis for one bone-dry metric ton of wood chips [1]

| Feedstock Procurement |       |        | Feedstock Preparation |                |        |
|-----------------------|-------|--------|-----------------------|----------------|--------|
|                       | Units | Value  |                       |                |        |
| <i>Processing</i>     |       |        | <i>Chipper</i>        |                |        |
| Diesel                | L     | 1.0115 | Diesel                | L              | 0.5461 |
| Lubricants            | L     | 0.0182 | Lubricants            | L              | 0.0098 |
| <i>Sorting</i>        |       |        | <i>Screener</i>       |                |        |
| Diesel                | L     | 0.346  | Diesel                | L              | 1.5939 |
| Lubricants            | L     | 0.006  | Lubricants            | L              | 0.0287 |
| <i>Loading</i>        |       |        | <i>Dryer</i>          |                |        |
| Diesel                | L     | 0.708  | Electricity           | kWh            | 7.14   |
| Lubricants            | L     | 0.013  | Propane               | L              | 20.9   |
| VOC                   | g     | 8.54   | VOC                   | g              | 2.13   |
| <i>Hauling</i>        | km    | 18.77  | Torgas                | m <sup>3</sup> | 212    |
|                       |       |        | Waste heat            | MJ             | 391    |

Table S2: Input-output flows of non-torrefied briquette (NTB) and torrefied briquette (TOB) production and use<sup>a</sup>[1]

| <i>Torrefaction Inputs</i>  | Units                              | TOB    |        |
|-----------------------------|------------------------------------|--------|--------|
| Dry wood chip               | kg db/MJ torrefied chips           | 0.063  |        |
| Lubricants                  | ml/MJ torrefied chips              | 0.002  |        |
| Electricity                 | kWh/MJ torrefied chips             | 0.019  |        |
| NaOH                        | gr/MJ torrefied chips              | 0.667  |        |
| <i>Torrefaction Outputs</i> |                                    |        |        |
| Bio-oil                     | L/MJ torrefied chips               | 0.011  |        |
| Torgas                      | m <sup>3</sup> /MJ torrefied chips | 0.043  |        |
| Briquetter                  |                                    | TOB    | NTB    |
| Electricity                 | kWh/MJ TOB                         | 0.0037 | 0.0039 |
| Lubricants                  | ml/MJ TOB                          | 0.0002 | 0.0002 |
| <i>Packaging</i>            |                                    | TOB    | NTB    |
| LDPE packaging              | gr/BDT                             | 0.632  | 0.686  |
| Distribution to user        | km                                 | 90     | 90     |

|                                              |                 |        |        |
|----------------------------------------------|-----------------|--------|--------|
| Distribution to PP                           | km              | 211    | 211    |
| Grinding                                     | Wh/MJ briquette | 5.393  | 17.989 |
| <i>Combustion at stove (Use phase)</i>       | Units           | TOB    | NTB    |
| CO                                           | gr/MJ briquette | 3.4756 | 5.0638 |
| NO <sub>x</sub>                              | gr/MJ briquette | 0.0277 | 0.0375 |
| SO <sub>2</sub>                              | gr/MJ briquette | 0.0079 | 0.0073 |
| CH <sub>4</sub>                              | gr/MJ briquette | 0.0023 | 0.0039 |
| VOC                                          | gr/MJ briquette | 0.7295 | 0.7638 |
| PM <sub>2.5</sub>                            | gr/MJ briquette | 0.0143 | 0.0354 |
| PM <sub>10</sub>                             | gr/MJ briquette | 0.1036 | 0.2175 |
| CO <sub>2</sub> (biogenic)                   | gr/MJ briquette | 76.873 | 85.43  |
| <i>Combustion at power plant (Use phase)</i> | Units           | TOB    |        |
| CH <sub>4</sub>                              | gr/MJ briquette | 0.0003 |        |
| N <sub>2</sub> O                             | gr/MJ briquette | 0.0021 |        |
| CO                                           | gr/MJ briquette | 0.0021 |        |
| VOC                                          | gr/MJ briquette | 0.0013 |        |
| NO <sub>x</sub>                              | gr/MJ briquette | 0.0751 |        |
| SO <sub>2</sub>                              | gr/MJ briquette | 0.0161 |        |
| CO <sub>2</sub> biogenic                     | gr/MJ briquette | 72.87  |        |
| PM <sub>2.5</sub>                            | gr/MJ briquette | 0.059  |        |
| PM <sub>10</sub>                             | gr/MJ briquette | 0.2    |        |

<sup>a</sup> LDPE, low-density polyethylene; BDT, bone-dry ton; VOC, volatile organic compounds; PM, particulate matter.

Table S3: Capital cost and operating costs of WB and TWB production systems for six scenarios [2].

| WB system                   | Case 1 (Base case) | Case 2  | Case 3  | Case 4  | Case 5  | Case 6  |
|-----------------------------|--------------------|---------|---------|---------|---------|---------|
| Capital cost (\$)           | 390,000            | 364,694 | 315,000 | 315,000 | 390,000 | 390,000 |
| Feedstock cost (\$/ODMT)    | 17.36              | 17.36   | 25.19   | 41.17   | 17.36   | 17.36   |
| Operational cost (\$/year)  | 273,312            | 324,365 | 409,735 | 453,961 | 525,225 | 273,312 |
| Product transport (\$/DOMT) | 15.16              | 15.16   | -       | -       | 15.16   | 15.16   |
| TWB system                  | Case 1 (Base case) | Case 2  | Case 3  | Case 4  | Case 5  | Case 6  |
| Capital cost (\$)           | 960,000            | 921,375 | 810,000 | 810,000 | 960,000 | 960,000 |
| Feedstock cost (\$/ODMT)    | 26.36              | 26.36   | 34.19   | 50.17   | 31.40   | 26.36   |
| Operational cost (\$/year)  | 427,349            | 561,401 | 394,834 | 439,874 | 483,468 | 427,349 |
| Product transport (\$/DOMT) | 14.21              | 14.21   | -       | -       | 14.21   | 14.21   |

Table S4: Summary of inputs for TEA study with uncertainty distributions.

| Descriptions                 | Minimum | Base              | Maximum | Distribution | Source       |
|------------------------------|---------|-------------------|---------|--------------|--------------|
| Discount rate                | 10%     | 15%               | 20%     | Triangular   | [2,3]        |
| Loan financing               | 0%      | 50%               | 100%    | Triangular   | [2,3]        |
| Economic life                | 5       | 10                | 15      | Triangular   | [2,3]        |
| Operating hour               | 8       | 16                | 24      | Triangular   | [2,3]        |
| Operating days               | 240     | 300               | 360     | Triangular   | [2,3]        |
| Capital investment           | -20%    | Scenario-specific | 20%     | Triangular   | [2,3]        |
| Fixed OPEX                   | -20%    | Scenario-specific | 20%     | Triangular   | [2,3]        |
| Feedstock price              | -20%    | Scenario-specific | 20%     | Triangular   | [4]          |
| Products transport cost      | -20%    | Scenario-specific | 20%     | Triangular   | Primary data |
| Propane cost (\$/liter)      | -20%    | 0.59              | 20%     | Triangular   | [5]          |
| Labor costs (\$/hr)          | -20%    | Scenario-specific | 20%     | Triangular   | [2]          |
| Torrefaction conversion rate | -15%    | Scenario-specific | 15%     | Triangular   | Primary data |
| Feedstock moisture content   | 15%     | Scenario-specific | 50%     | Triangular   | Primary data |

Table S5: Environmental impacts of 1 MJ of heat generated for domestic heating from WB.

| Impact category       | Unit                    | Feedstock procurement | Hauling  | Feedstock preparation | Briquetter | Packaging | Distribution | Use      |
|-----------------------|-------------------------|-----------------------|----------|-----------------------|------------|-----------|--------------|----------|
| Ozone depletion       | kg CFC-11 eq            | 1.11E-12              | 2.22E-13 | 1.33E-11              | 1.75E-13   | 1.08E-15  | 1.10E-12     | 0.00E+00 |
| Global warming        | kg CO <sub>2</sub> eq   | 6.08E-04              | 1.99E-04 | 7.58E-03              | 9.93E-05   | 1.08E-07  | 6.61E-04     | 1.24E-04 |
| Smog                  | kg O <sub>3</sub> eq    | 4.86E-04              | 3.21E-05 | 7.82E-04              | 1.01E-04   | 3.06E-09  | 1.05E-04     | 1.70E-03 |
| Acidification         | kg SO <sub>2</sub> eq   | 8.00E-06              | 1.05E-06 | 2.80E-05              | 3.64E-06   | 2.29E-10  | 3.65E-06     | 4.67E-05 |
| Eutrophication        | kg N eq                 | 6.14E-07              | 8.72E-08 | 3.13E-06              | 2.19E-07   | 7.69E-10  | 3.38E-07     | 2.34E-06 |
| Carcinogenics         | CTUh                    | 1.01E-11              | 2.01E-12 | 1.20E-10              | 1.59E-12   | 1.42E-15  | 1.00E-11     | 0.00E+00 |
| Non carcinogenics     | CTUh                    | 9.93E-11              | 1.98E-11 | 1.19E-09              | 1.56E-11   | 3.86E-14  | 9.87E-11     | 0.00E+00 |
| Respiratory effects   | kg PM <sub>2.5</sub> eq | 1.58E-07              | 1.62E-08 | 5.24E-07              | 1.11E-07   | 9.19E-12  | 5.63E-08     | 5.21E-05 |
| Ecotoxicity           | CTUe                    | 2.54E-03              | 5.08E-04 | 3.04E-02              | 4.00E-04   | 4.51E-06  | 2.53E-03     | 0.00E+00 |
| Fossil fuel depletion | MJ surplus              | 1.25E-03              | 2.49E-04 | 1.49E-02              | 1.96E-04   | 5.60E-07  | 1.24E-03     | 0.00E+00 |

Table S6: Environmental impacts of 1 MJ of heat generated for domestic heating from TWB.

| Impact category       | Unit                    | Feedstock procurement | Hauling  | Feedstock preparation | Torrefaction | Briquetter | Distribution | Packaging | Use      |
|-----------------------|-------------------------|-----------------------|----------|-----------------------|--------------|------------|--------------|-----------|----------|
| Ozone depletion       | kg CFC-11 eq            | 1.26E-12              | 2.51E-13 | 1.49E-11              | 1.46E-10     | 3.42E-13   | 8.17E-13     | 8.02E-16  | 0.00E+00 |
| Global warming        | kg CO <sub>2</sub> eq   | 6.89E-04              | 2.26E-04 | 5.02E-03              | 9.82E-03     | 1.96E-04   | 4.89E-04     | 8.02E-08  | 7.57E-05 |
| Smog                  | kg O <sub>3</sub> eq    | 2.97E-04              | 3.64E-05 | 7.51E-04              | 1.46E-03     | 1.99E-04   | 7.75E-05     | 2.27E-09  | 4.61E-03 |
| Acidification         | kg SO <sub>2</sub> eq   | 9.07E-06              | 1.20E-06 | 2.65E-05              | 5.87E-05     | 7.18E-06   | 2.70E-06     | 1.69E-10  | 3.59E-05 |
| Eutrophication        | kg N eq                 | 6.96E-07              | 9.89E-08 | 2.63E-06              | 6.83E-06     | 4.30E-07   | 2.50E-07     | 5.70E-10  | 1.61E-06 |
| Carcinogenics         | CTUh                    | 1.15E-11              | 2.28E-12 | 7.98E-11              | 1.63E-10     | 3.11E-12   | 7.41E-12     | 1.05E-15  | 0.00E+00 |
| Non carcinogenics     | CTUh                    | 1.13E-10              | 2.25E-11 | 7.91E-10              | 1.70E-09     | 3.06E-11   | 7.31E-11     | 2.86E-14  | 0.00E+00 |
| Respiratory effects   | kg PM <sub>2.5</sub> eq | 1.79E-07              | 1.84E-08 | 5.31E-07              | 1.63E-06     | 2.18E-07   | 4.17E-08     | 6.81E-12  | 2.13E-05 |
| Ecotoxicity           | CTUe                    | 2.88E-03              | 5.77E-04 | 2.00E-02              | 3.72E-02     | 7.83E-04   | 1.88E-03     | 3.34E-06  | 0.00E+00 |
| Fossil fuel depletion | MJ surplus              | 1.41E-03              | 2.83E-04 | 9.80E-03              | 1.83E-02     | 3.84E-04   | 9.20E-04     | 4.15E-07  | 0.00E+00 |

Table S7: Environmental impacts of 1 kWh generated at coal-fired power plant from TWB.

| Impact category       | Unit                    | Feedstock procurement | Hauling  | Feedstock preparation | Torrefaction | Briquetter | Distribution | Grinding | Use      |
|-----------------------|-------------------------|-----------------------|----------|-----------------------|--------------|------------|--------------|----------|----------|
| Ozone depletion       | kg CFC-11 eq            | 1.02E-11              | 2.03E-12 | 1.20E-10              | 1.18E-09     | 2.76E-12   | 1.54E-11     | 8.05E-10 | 0.00E+00 |
| Global warming        | kg CO <sub>2</sub> eq   | 5.57E-03              | 1.82E-03 | 4.05E-02              | 7.93E-02     | 1.58E-03   | 9.25E-03     | 2.88E-02 | 6.01E-05 |
| Smog                  | kg O <sub>3</sub> eq    | 2.40E-03              | 2.94E-04 | 6.06E-03              | 1.18E-02     | 1.61E-03   | 1.46E-03     | 9.88E-04 | 1.97E-02 |
| Acidification         | kg SO <sub>2</sub> eq   | 7.32E-05              | 9.65E-06 | 2.14E-04              | 4.74E-04     | 5.80E-05   | 5.11E-05     | 1.17E-04 | 7.25E-04 |
| Eutrophication        | kg N eq                 | 5.62E-06              | 7.99E-07 | 2.12E-05              | 5.52E-05     | 3.47E-06   | 4.73E-06     | 6.21E-05 | 3.52E-05 |
| Carcinogenics         | CTUh                    | 9.25E-11              | 1.84E-11 | 6.44E-10              | 1.32E-09     | 2.51E-11   | 1.40E-10     | 8.82E-10 | 0.00E+00 |
| Non carcinogenics     | CTUh                    | 9.09E-10              | 1.82E-10 | 6.38E-09              | 1.37E-08     | 2.47E-10   | 1.38E-09     | 3.25E-09 | 0.00E+00 |
| Respiratory effects   | kg PM <sub>2.5</sub> eq | 1.45E-06              | 1.49E-07 | 4.29E-06              | 1.32E-05     | 1.76E-06   | 7.89E-07     | 6.95E-06 | 7.51E-05 |
| Ecotoxicity           | CTUe                    | 2.33E-02              | 4.66E-03 | 1.61E-01              | 3.00E-01     | 6.32E-03   | 3.55E-02     | 7.59E-02 | 0.00E+00 |
| Fossil fuel depletion | MJ surplus              | 1.14E-02              | 2.29E-03 | 7.91E-02              | 1.48E-01     | 3.10E-03   | 1.74E-02     | 3.35E-02 | 0.00E+00 |



## References

1. Alanya-Rosenbaum, S.; Bergman, R.D. Life-cycle impact and exergy based resource use assessment of torrefied and non-torrefied briquette use for heat and electricity generation. *Journal of Cleaner Production* **2019**, *233*, 918-931, doi:<https://doi.org/10.1016/j.jclepro.2019.05.298>.
2. Sahoo, K.; Bilek, E.; Bergman, R.; Mani, S. Techno-economic analysis of producing solid biofuels and biochar from forest residues using portable systems. *Applied Energy* **2019**, *235*, 578-590, doi:<https://doi.org/10.1016/j.apenergy.2018.10.076>.
3. Campbell, R.M.; Anderson, N.M.; Daugaard, D.E.; Naughton, H.T. Financial viability of biofuel and biochar production from forest biomass in the face of market price volatility and uncertainty. *Applied Energy* **2018**, *230*, 330-343, doi:<https://doi.org/10.1016/j.apenergy.2018.08.085>.
4. Sahoo, K.; Bilek, E.; Bergman, R.; Kizha, A.R.; Mani, S. Economic analysis of forest residues supply chain options to produce enhanced-quality feedstocks. *Biofuels, Bioproducts and Biorefining* **2019**, *13*, 514-534, doi:<https://doi.org/10.1002/bbb.1958>.
5. US-EIA. Petroleum & other liquids. Available online: <https://www.eia.gov/petroleum/data.php#prices> (Accessed on 03/15/2021).
